# Supplementary material
Source: Research Square preprint supplement (doi:10.21203/rs.3.rs-10394517/v1)
Supplement: Supplementary file 1 [file 9c12dee3295d904a38708a72.docx]

**Supplementary Materials for "Circuit-Level vs Pulse-Level Quantum Hardware Diagnostics"**

Ramakrishna Pasupuleti — Independent Researcher, Suryapet, Telangana, India

*ORCID: 0009-0008-8418-1430 | workisfun415@gmail.com | July 2026*

# **S1. Complete Raw Data Tables**

This section provides complete raw experimental data for all measurements reported in the main text. All data is also available in JSON format at https://github.com/workisfun415/kr-quantum-nisq-diagnostic and https://doi.org/10.5281/zenodo.19626298.

## **S1.1 ibm_kingston GHZ Scaling (Campaign C1)**

| **n (qubits)** | **2** | **3** | **4** | **5** | **6** | **7** | **8** | **9** | **10** |
| --- | --- | --- | --- | --- | --- | --- | --- | --- | --- |
| **Infidelity** | 0.0171 | 0.0349 | 0.0398 | 0.0662 | 0.0803 | 0.0967 | 0.1536 | 0.1604 | 0.1790 |

*K-R fit: α = 1.541, R² = 0.975. Shots: 4096 per circuit.*

## **S1.2 ibm_marrakesh GHZ Scaling n=2 to 30 (Campaign C4)**

| **n (qubits)** | **2** | **5** | **10** | **15** | **20** | **25** | **30** |
| --- | --- | --- | --- | --- | --- | --- | --- |
| **Fidelity** | 0.9800 | 0.9441 | 0.8364 | 0.7336 | 0.3979 | 0.2280 | 0.1565 |
| **Infidelity** | 0.0200 | 0.0559 | 0.1636 | 0.2664 | 0.6021 | 0.7720 | 0.8435 |

*K-R fit: α = 1.406, R² = 0.967. Total: 7 circuits.*

## **S1.3 All K-R Fits — Complete Parameter Table**

| **Experiment** | **α** | **C₀** | **R** | **R²** | **Regime** | **n pts** |
| --- | --- | --- | --- | --- | --- | --- |
| ibm_kingston GHZ C1 | 1.541 | 0.008 | 0.000 | 0.975 | Structured | 9 |
| ibm_kingston Depth C1 | 0.507 | 0.044 | 0.000 | 0.813 | Stochastic | 7 |
| ibm_kingston Amplif C2 | 1.190 | 0.199 | 0.000 | 1.000 | Structured | 4 |
| ibm_kingston GHZ C2 | 1.636 | 0.009 | 0.000 | 0.977 | Structured | 9 |
| ibm_kingston Clifford C2 | 0.533 | 0.044 | 0.000 | 0.998 | Stochastic | 7 |
| ibm_kingston Echo C2 | 0.609 | 0.065 | 0.000 | 0.894 | Stochastic | 6 |
| ibm_fez GHZ C1 | 0.907 | 0.132 | 0.000 | 0.986 | Stochastic | 9 |
| ibm_fez Depth C1 | 0.321 | 0.187 | 0.000 | 0.812 | Saturated | 7 |
| ibm_fez GHZ C2 | 2.582 | 0.001 | 0.133 | 0.912 | Structured | 9 |
| ibm_fez Echo C2 | 0.690 | 0.013 | 0.008 | 0.975 | Stochastic | 6 |
| ibm_marrakesh GHZ C4 | 1.406 | 0.008 | 0.000 | 0.967 | Structured | 7 |
| ibm_marrakesh Depth C4 | 1.493 | 0.046 | 0.000 | 0.900 | Structured | 7 |
| ibm_marrakesh Amplif C4 | 0.599 | 0.128 | 0.000 | 0.996 | Stochastic | 4 |
| ibm_marrakesh GHZ C5 (Jul 5) | 3.811 | 0.001 | 0.000 | 0.980 | Structured | 5 |
| ibm_marrakesh Clifford C5 (Jul 5) | 1.785 | 0.046 | 0.000 | 0.968 | Structured | 7 |
| ibm_marrakesh Echo C5 (Jul 5) | 0.354 | 0.067 | 0.005 | 0.946 | Stochastic | 6 |

# **S2. Mathematical Proofs**

## **S2.1 Proof of Appendix A Theorem 1**

Let circuit fidelity F(d) satisfy the ODE:

*dF/dd = -λ(d)F, λ(d) = λ₀d^(α-1)* (SA1)

with F(0) = 1. Under moderate-noise assumption ε = λ₀d^α/α ≪ 1:

Step 1 (Integration): Separating variables and integrating:

*F(d) = exp(-λ₀d^α/α)* (SA2)

Step 2 (Taylor expansion): Setting x = ε ≪ 1:

*F(d) = 1 - λ₀d^α/α + O(d^2α)* (SA3)

Step 3 (Substitution): With K = 1/d and C₀ = λ₀/α:

*C(d) = 1 - F(d) + R = C₀/K^α + R + O(K^(-2α)) QED* (SA4)

Remark: Assumption A1 is not derived from Lindblad dynamics. This theorem establishes internal self-consistency of the K-R ansatz, not its microscopic origin. The neglected terms satisfy O(ε²) = O(K^(-2α)).

## **S2.2 Proof 4: α_depth + α_echo = 2**

For a device dominated by 1/f noise with spectrum S(f) ~ f^(-β):

*α_depth = 2 - β (Appendix B, Theorem 2)* (SP1)

The Hahn echo filter function F_echo(f) = sin⁴(πfτ)/(πfτ)² refocuses static errors. The remaining decay under 1/f noise gives:

*C_echo(τ) ~ τ^β ⟹ α_echo = β* (SP2)

Therefore:

*α_depth + α_echo = (2 - β) + β = 2 QED* (SP3)

Hardware validation (ibm_marrakesh, Jul 5, 2026): α_depth = 1.7853, α_echo = 0.3544, sum = 2.1397, error = 7.0%. This is the first experimental confirmation of Proof 4.

# **S3. Per-Qubit Calibration Data**

IBM pulse-level calibration data for ibm_marrakesh (Jul 5, 2026):

| **Qubit** | **T₁ (μs)** | **T₂ (μs)** | **T₂/T₁** | **Gate Error (×10⁻³)** | **Circuit T₂* (μs)** | **IBM/Circuit** |
| --- | --- | --- | --- | --- | --- | --- |
| Q0 | 190.3 | 32.3 | 0.170 | 0.782 | 9-30 | 1.1-3.6× |
| Q1 | 182.7 | 147.1 | 0.805 | 0.923 | — | — |
| Q2 | 260.8 | 339.6 | 1.303 | 0.651 | ~30 | ~11× |
| Q3 | 180.2 | 79.0 | 0.438 | 0.745 | — | — |
| Q4 | 193.1 | 80.6 | 0.418 | 0.812 | — | — |
| **Mean Q0-Q4** | 201.4 | 135.7 | 0.627 | 0.783 | — | 3-11× |

** Circuit T₂ estimated from Ramsey decay envelope. — indicates not measured in this campaign.*

# **S4. Comparison with Standard Methods**

| **Method** | **Circuits** | **Time** | **Regime Classification** | **Coherent/ Stochastic** | **Drift Detection** | **Scales with Processor** |
| --- | --- | --- | --- | --- | --- | --- |
| **K-R Framework** | 13 | 3-5 min | YES | YES | YES | NO (O(m)) |
| Randomized Benchmarking | 100-300 | 1-2 hr | NO | Partial | NO | YES |
| Gate Set Tomography | 500-2000 | 4-8 hr | Partial | YES | NO | YES |
| Cross-Entropy Bench. | 1000+ | 8+ hr | NO | NO | NO | Exp. cost |
| T₁/T₂ Calibration | 0 | 0 min | NO | NO | NO | YES |

# **S5. Software and Data Availability**

All experimental code is available at:

GitHub: https://github.com/workisfun415/kr-quantum-nisq-diagnostic

Zenodo: https://doi.org/10.5281/zenodo.19626298

Key Python files:

• kr_marrakesh_experiment.py — IBM Quantum GHZ scaling to n=30

• kr_hardware_experiments.py — Temporal drift, amplification, shot noise

• kr_beta_extraction.py — Circuit T₂ vs IBM T₂ comparison

• make_paper2_figures.py — All figures from raw data

• paper2_experiments.py — Complete Paper 2 experiment suite

Requirements: Python 3.10+, qiskit >= 1.0, qiskit-ibm-runtime >= 0.20, numpy, scipy, matplotlib. IBM Quantum account required for hardware experiments.
